# Supplementary material for: Tunable protein crystal size distribution via continuous slug-flow crystallization with spatially varying temperature
Source: Royal Society of Chemistry journal article supplement (doi:10.1039/d1ce00387a), 2021-01-01
Supplement: d1ce00387a1.pdf [file d1ce00387a1.pdf]

1

2

3

4

5

## **Tunable Protein Crystal Size Distribution via Continuous**

6

## **Slug-Flow Crystallization with Spatially Varying Temperature**

7

8

Nicholas J. Mozdierz<sup>1</sup>, Moo Sun Hong<sup>1</sup>, Yongkyu Lee<sup>1,2</sup>, Moritz H. P. Benisch<sup>1,3</sup>, Mo Jiang<sup>4</sup>,

9

Allan S. Myerson<sup>1</sup>, and Richard D. Braatz<sup>1†</sup>

10

11

12

13

14

<sup>1</sup>*Dept. of Chemical Engineering, Massachusetts Institute of Technology, Cambridge, MA, USA*

15

<sup>2</sup>*Dept. of Chemical & Biological Engineering, Seoul National University, Seoul, South Korea*

16

<sup>3</sup>*Institute for Chemical & Bioengineering, ETH Zurich, Zurich, Switzerland*

17

<sup>4</sup>*Dept. of Chemical & Life Science Engineering, Virginia Commonwealth University, Richmond, VA, USA*

18

19

20

† [braatz@mit.edu](mailto:braatz@mit.edu)

21

## **Abstract**

22 Accompanied with the growth of the biopharmaceuticals market has been an interest in  
23 developing processes with increased control of product quality attributes at low manufacturing  
24 cost, with one of the approaches being through genuinely continuous manufacturing processes.  
25 Part of this interest is in new drug product formulations that extend shelf-life and improve the  
26 patient experience. Some of these drug product formulations require the production of protein  
27 crystals of controlled size distribution. This article describes a continuous tubular crystallizer in  
28 which the size distribution of the produced protein crystals is tuned by controlling the spatial  
29 temperature along the tube. Under the proper buffer and pH condition, the magnitude and  
30 dispersion of product protein crystals are reproducibly manipulated using a fully controlled  
31 temperature profile over a 25- to 30-minute residence time, and the formation of amorphous  
32 precipitates can be achieved under higher supersaturation condition via the addition of  
33 concentrated precipitant for drug products in which higher solubility is desired. The tunable  
34 continuous process for protein crystallization has the potential to become a low-cost platform  
35 technology for producing protein crystals for a variety of biologic drug product formulations.

## **Keywords**

37 Continuous manufacturing; pharmaceutical crystallization; continuous crystallization;  
38 population balance modeling; tubular crystallization; slug-flow crystallization

## 39           **1 . Introduction**

40       From an industrial perspective, an opportunity exists to develop scalable non-chromatographic  
41 protein separations methods that disrupt the traditional batch-wise paradigm and support  
42 continuous purification modes<sup>1-3</sup>. Despite efforts to demonstrate the future viability of sequential  
43 ‘bind-and-elute’ chromatography, resin-based adsorption processes are costly and widely  
44 perceived within the biomanufacturing field to be a major process bottleneck<sup>1,4-6</sup>. Technologies  
45 such as periodic counter-current chromatography (PCC), simulated moving bed chromatography  
46 (SMB), and multi-column counter-current solvent gradient purification (MCSGP) have been  
47 demonstrated to reduce this bottleneck<sup>7</sup>. Each of these processes, however, employs more  
48 columns, valves, and pumps than sequential chromatography, substantially increasing both system  
49 complexity and capital equipment costs<sup>2,8,9</sup>. Further, given that they require the same number of  
50 stages as sequential chromatography to achieve the same purification efficiency – but operate at  
51 higher throughputs using more resin – PCC, SMB, and MCSGP have operating expenses (OPEX)  
52 costs that scale linearly with respect to conventional techniques. In contrast, non-chromatographic  
53 protein purification methods such as precipitation, aqueous two-phase extraction (ATPE), and  
54 crystallization are relatively simple to execute, require a small initial capital investment, and boast  
55 OPEX costs (primarily buffers/solvents) that scale sub-linearly with throughput<sup>2,6,7</sup>. A single  
56 example of the application of each of these three techniques to continuous protein purification has  
57 been published<sup>10-12</sup>. In addition to reducing facility footprints, precipitation, ATPE, and  
58 crystallization have the potential to dramatically increase equipment utilization, allowing the  
59 biopharmaceutical sector to realize higher productivities and improved operational flexibility<sup>2,3,7</sup>.  
60 These methods could also support the robust control of short product residence times, allowing for

61 the rapid recovery of labile protein and standardization of critical quality attributes across each  
62 lot<sup>3,7</sup>. Finally, the improved purification efficiency gleaned by coupling these techniques with  
63 ‘clean’ expression hosts (*e.g.*, *Komagataella phaffii*), as well as their amenability to scale-out by  
64 parallelization<sup>13,14</sup>.

65 Despite its potential cost-effectiveness and scalability, however, the intrinsic difficulty of  
66 optimizing and controlling protein crystallization has prevented its broad adoption as a preparative  
67 purification technique<sup>7,15</sup>. Specifically, a generalized set of heuristics governing the myriad  
68 physical, chemical, and biochemical factors that can impact protein crystal nucleation and growth  
69 has yet to be realized<sup>15-17</sup>. Consequently, while a wide range of proteins has been crystallized at  
70 the  $\mu\text{L}$  scale for structure determination using various combinatorial screening approaches (*e.g.*,  
71 hanging and sitting drop vapor diffusion, free interface diffusion, and dialysis), recombinant  
72 insulins are the only biopharmaceutical reported to be purified by crystallization at the industrial  
73 scale<sup>7,18</sup>. Studies surrounding the batch crystallization of enzymes (*e.g.* hen egg white lysozyme  
74 (HEWL), lipase) and monoclonal antibody fragments from both homo- and heterogeneous  
75 mixtures at volumes ranging from 100 mL to 1 L represent promising demonstrations of this  
76 technique as a method for ‘at-scale’ purification, but fall short of proving industrial applicability<sup>15</sup>.

77 In addition, protein crystallization from nearly pure solution is suitable for producing crystals  
78 in drug product formulation/delivery<sup>19</sup>. Amorphous lyophilizates and aqueous solutions are  
79 commonly used for formulation/delivery but have low stability and high viscosity at high  
80 concentration. Crystals have a higher stability and could lead to a better patient experience with  
81 consistent controlled properties. For injection, which is currently the primary mode of  
82 administration, high viscosity requires a large-bore needle and a high amount of force to push the

83 needle into the body, which is painful for the patient. Experimental results for monoclonal  
84 antibodies have demonstrated that injection of a crystalline suspension reduces the syringe force  
85 by about 50% for the same protein concentration compared to liquid formulation<sup>15</sup>. The injection  
86 of crystals also enables the protein to be taken into the blood stream at a slower rate for a more  
87 sustained release. In all of these protein crystal-based drug product formulations, the rate of uptake  
88 of the biotherapeutic protein molecules into the bloodstream depends critically on the size  
89 distribution of the protein crystals.

90 A recent set of experiments has demonstrated tubular designs as viable technologies for protein  
91 crystallization<sup>12,20</sup>. Using a low-cost setup designed around disposable plastic components and  
92 syringe pumps, crystallization of HEWL was reported from a purified solution at a rate of 0.72  
93 g/h. Such studies have not demonstrated robust feedback process control. In this article, we  
94 leverage optimization/control theory – building off from prior art surrounding the tubular  
95 crystallization of small molecules and active pharmaceutical ingredients – and develop a flexible  
96 flow-through system for the continuous crystallization of therapeutically relevant proteins under  
97 feedback control.

98 Here, a fully automated system designed to operate under segmented slug-flow and capable of  
99 on-line control of the cooling process is applied to the continuous crystallization of the model  
100 protein HEWL. In addition to temperature, pH and buffered precipitant solution are used to control  
101 the supersaturation of HEWL at various defined points along the length of the crystallizer. These  
102 parameters are carefully combined to permit tuning the particle size distribution (PSD) generated  
103 by the counter current heat exchanger (CCHEx) platform under controlled and seeded inlet  
104 conditions. The system is further demonstrated that this control is possible over a residence time

105 as short as 25–30 minutes (2x–4x shorter than similar recent reports). Powder X-Ray Diffraction  
106 (PXRD) and cross-polarized transmitted light microscopy are used to qualitatively score the  
107 relative ratio of amorphous-to-crystalline HEWL generated under each set of conditions tested.  
108 The images acquired using cross-polarized light is analyzed using the custom crystal image  
109 analysis algorithm designed for adjusting contrast and segmenting overlaid crystal image.

110

## 111 **2. Experimental method**

### 112 **2.1. Materials**

113 Hen egg white lysozyme (HEWL) was used as the model protein for all experiments as  
114 described. Buffer preparation involved sodium acetate (NaOAc), hydrochloric acid (HCl), HPLC-  
115 grade distilled deionized water, and disposable 0.2  $\mu\text{m}$  vacuum filtration systems. A 1 M solution  
116 of sodium hydroxide (NaOH) was used to flush the CCHEx crystallizer at the beginning and end  
117 of each day of experiments.

118 Seed solutions for all experiments were prepared by first suspending HEWL in a refrigerated  
119 solution of 2% w/v sodium chloride (NaCl) and 100 mM NaOAc (pH 4.0) to a concentration of  
120 70 g/L. The suspension was then placed in a water bath held at 30°C and stirred for 3.5 hours.  
121 The resulting hazy solution was subsequently vacuum filtered, placed back in the water bath, and  
122 allowed to cool spontaneously overnight. Before first use, the seed solution was heated to the  
123 appropriate temperature as indicated in Table 1.

## 124           **2.2.       Experimental apparatus**

125       The experimental apparatus in Fig. 1 consists of peristaltic pumps, heat exchangers (HEX),  
126 heating and cooling baths, and controlled-temperature water baths<sup>21,22</sup>. All but one of the  
127 components are integrated in a computer used for collecting data and performing real-time control  
128 calculations. The precipitant pump containing NaCl aqueous solution was not integrated into the  
129 larger control system, as the in-line precipitant mixing was manually set at the beginning of the  
130 experiment and was not changed during each experiment. The precipitant solution was stored in a  
131 magnetically stirred, jacketed, 1 L, glass, two-necked round-bottom flask plumbed in series with  
132 the cold coolant reservoir and seed/feedstock solution Allihn condenser.

133       The temperature-controlled HEWL solution enters the crystallizer from the round-bottom flask  
134 at the left in Fig. 1 and traverses a short segment of insulated tubing before transiting through the  
135 preliminary heat exchanger (pre-HEX) and mixing with a slipstream of concentrated, chilled, and  
136 buffered NaCl. The mixture of HEWL and precipitant then traverse under an indirect  
137 ultrasonication probe and mixes with filtered air to form stable liquid slugs. Slug flow is  
138 hydrodynamically stable for a very large range of gas and liquid flow rates for the tubing diameter  
139 and fluid properties in the experiments in this study, as observed experimentally in consistency  
140 with theoretical expressions as detailed in a recent book chapter<sup>23</sup>. The slugs then move through  
141 HEXs 1, 2, and 3 prior to be collected for imaging and PXRD analysis at the outlet. For all  
142 experiments that did not employ concentrated precipitant addition, the air and liquid flow rates  
143 into the slugging tee were both 7 mL/min. The air and liquid flow rates into the slugging tee during  
144 experiments that involved concentrated precipitant addition were 7 and 9.61 mL/min (HEWL  
145 solution 7 mL/min and precipitant solution 2.61 mL/min), respectively. For each HEX, the shell-

146 side flowrate from the peristaltic pumps is given by the proportional-integral (PI) controllers to  
147 achieve the set point temperature.

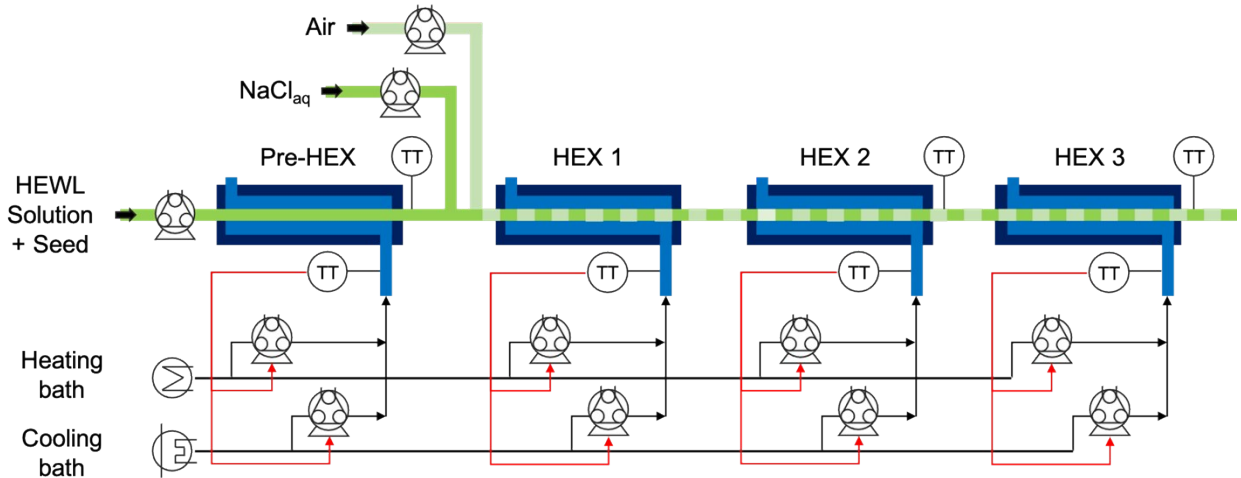

148

149 Figure 1. A process flow diagram of the continuous crystallizer with in-line precipitant mixing capabilities,  
150 where HEWL is hen egg white lysozyme, HEX refers to a heat exchanger, and TT refers to a temperature  
151 transmitter.

### 152 2.3. Design of experiments

153 Each of the four sets of experimental conditions tested was designed to expose HEWL  
154 transiting the continuous system to markedly different supersaturation conditions while holding  
155 constant the residence time of the slugs (Table 1). All temperature and the concentration of  
156 precipitant set points were determined with the aid of empirical models fitted to solubility data<sup>24</sup>.  
157 Specifically, Experiment 1 was designed to ‘crash cool’ the HEWL solution immediately upon  
158 entering the pre-HEX module by exposure to a maximum instantaneous supersaturation ( $\sigma_{max}$ ,  
159 where  $\sigma = C/C_{sat} - 1$ ,  $C$  is the HEWL concentration, and  $C_{sat}$  is the solubility) equal to  $\sim 18$ .  
160 Experiment 2 is designed to reduce  $\sigma_{max}$  to  $\sim 6.4$  and promote dissolution in HEX 1 following  
161 primary nucleation in the pre-HEX. Experiment 3 was designed to expose slugs of dissolved and  
162 crystalline HEWL to a shallow temperature – and by extension, supersaturation – gradient with



163  $\sigma_{max}$  of  $\sim 4.3$  in an effort to favor the growth of seed crystals relative to the nucleation of new  
 164 particles. Finally, Experiment 4 represents a situation in which  $\sigma_{max}$  was varied aggressively  
 165 ( $\sim 220$ ) by using a combination of concentrated precipitant (*i.e.*, NaCl) addition and crash cooling.  
 166 Each of Experiments 1–3 was performed in duplicate. This study explores a wide range of  
 167 supersaturations to demonstrate the ability of the system to access a very large experimental design  
 168 space, and to assess the effects on the product crystals. Further, relative to Experiments 1–3,  
 169 Experiment 4 was designed to exploit the generalized phase behavior of protein solutions, which  
 170 predicts that extreme values of  $\sigma_{max}$  will preferentially induce the formation of amorphous  
 171 precipitates over well-ordered crystals<sup>25</sup>. In this way, disordered aggregates of HEWL are  
 172 generated intentionally as a control to aid in distinguishing crystalline from non-crystalline  
 173 samples by both cross-polarized microscopy and PXRD.

174 Table 1. HEWL experimental parameters and set points. T = temperature. Rep. = replicate. Precipitant was  
 175 15% w/v NaCl, 57.7 mM NaOAc, pH 4.0 buffer held at 3.0°C.

| Exp. | Rep. | Seed Bath<br>Temperature (°C) | Temperatures (°C) |       |       |       |
|------|------|-------------------------------|-------------------|-------|-------|-------|
|      |      |                               | Pre-HEX           | HEX 1 | HEX 2 | HEX 3 |
| 1    | 1    | 32.6                          | 5                 | 5     | 5     | 23    |
| 1    | 2    | 32.35                         | 5                 | 5     | 5     | 23    |
| 2    | 1    | 28.65                         | 14                | 20    | 11    | 7     |
| 2    | 2    | 28.45                         | 14                | 20    | 11    | 7     |
| 3    | 1    | 23.8                          | 17                | 15    | 11    | 8     |
| 3    | 2    | 23.9                          | 17                | 15    | 11    | 8     |
| 4    | 1    | 42                            | 5                 | 5     | 5     | 5     |

176

#### 177 2.4. Automated imaging analysis for particle size distribution

178 For each experiment, a single pulse of HEWL (Table 1) was fed into the continuous  
 179 crystallizer. Pulses of air (each 10 s long) bracketed the HEWL to aid in identifying crystal-  
 180 containing slugs at the outlet. All slugs of HEWL were collected as they exited the crystallizer in  
 181 a single sterile 50 mL conical tube. Four 45  $\mu\text{L}$  droplets of the collected slurry were immediately

182 transferred to an air-dusted microscope slide and protected from evaporation with cover glasses.  
183 A set of position matched images of each droplet was then acquired using a microscope fitted with  
184 a digital camera, a 10X trinocular eyetube, and 4X/0.10 HI PLAN objective. The resolution of this  
185 optical setup was  $1\ \mu\text{m}/\text{pixel}$ . Light intensity, aperture, and condenser settings were kept constant  
186 across all images and all experiments.

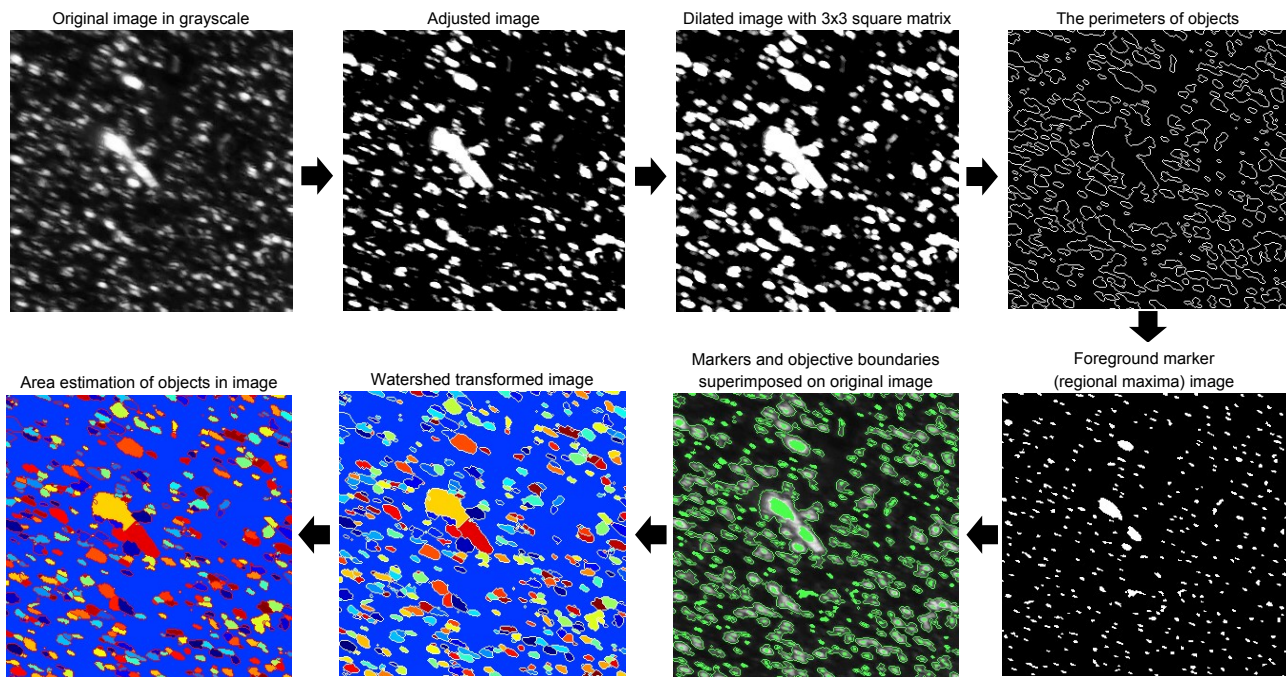

187

188 Figure 2. Graphical summary of the image processing algorithm which is a modified version of marker-  
189 controlled watershed segmentation for sorting out overlaid crystals.

190 Each of the four cross-polarized micrographs corresponding to a given experiment was  
191 analyzed using the watershed algorithm with markers and boundaries described in Fig. 2. First of  
192 all, the original color image is mapped to grayscale for adjusting the contrast. The adjusted image  
193 is dilated with structuring element neighborhood where pixels are connected along the horizontal  
194 or vertical direction for protecting tiny size crystals from eroding process. The boundaries of  
195 segmented objects are calculated in pixels and separate the threshold of regions for the watershed

196 method. The foreground markers in the object are obtained by a closing followed by erosion and  
197 are superimposed on grayscale image with the boundaries of regions. The magnitudes of markers  
198 are modified to regional minima of the objective region and scaled to different integer values. The  
199 flooding process is performed from the marker (the regional minima), and the borderline is  
200 constructed between the extended regions of different labeled markers. Finally, the area and length  
201 of crystals are estimated and used to acquire the particle size distribution.

## 202           **2.5.       Powder x-ray diffraction**

203       Approximately 10 minutes after collection (the time required to perform all imaging described  
204 in section 2.3), the remaining slurry from a given experiment was divided into 12 to 15 1.0-mL  
205 aliquots and centrifuged at 10,000 g and 22°C for 2 minutes. The resulting supernatant was  
206 subsequently aspirated off and discarded. A second identical centrifugation step was employed in  
207 the case when bulk liquid remained after aspiration. Pellets were then stored under ambient  
208 conditions for ~4 hours prior to analysis by PXRD. The obtained crystals were crushed using a  
209 mortar and pestle in order to maximize the number of visible crystal faces<sup>26</sup>.

210       PXRD was performed using a PANalytical X'Pert PRO diffractometer. The instrument was  
211 configured as described in a past study<sup>26</sup> and operated at a tension of 45 kV and an anode current  
212 of 40 mA. All scans were conducted under the following programmable settings to maximize  
213 resolution at low angles: 3.507°–13.5°  $2\theta$  range; 0.0167113° step; 455.295 s step time; 0.004661°/s  
214 scan speed; and 1 rps spinner stage rotation speed. Each scan analyzed the equivalent of at least 8  
215 pellets pressed onto a zero-background sample tray. A blank sample tray diffractogram was  
216 acquired under these same settings.

217 A negative control diffractogram of the 2% w/v NaCl and 100 mM NaOAc (pH 4.0) buffer  
218 used to prepare all HEWL solutions were obtained using the same instrument and hardware  
219 configuration noted above. 75 mL of the buffer was first boiled on a hot plate under stirring for 2  
220 hours to evaporate most of the bulk liquid. The remaining slurry was then dried in a vacuum oven  
221 overnight to yield a powder of crystalline NaCl and NaOAc in a mass ratio identical to that in the  
222 original buffer.

223

## 224 **3. Results and Discussion**

### 225 **3.1. Protein crystal populations**

226 Microscope images were acquired for each experiment using cross-polarized light (Fig. 3).  
227 Particles of HEWL that appear white are birefringent and are very likely crystalline<sup>27</sup>. Particles  
228 that appear dark are amorphous precipitates of HEWL or crystals possessing a cubic (*i.e.*, isotropic)  
229 lattice instead of the desired tetragonal structure. The inlet seed and outlet particles for  
230 Experiments 1 to 3 are overwhelming anisotropic crystals (Fig. 3). Experiment 4, which is at  
231 extremely high supersaturation  $\sigma_{max}$ , yielded minimal anisotropic crystals (Fig. 4). The production  
232 of different solid states during particle formation operating under different magnitude  
233 supersaturation is commonly observed for small molecule<sup>28</sup>, and can certainly occur for protein  
234 molecules which have many more degrees of freedom.

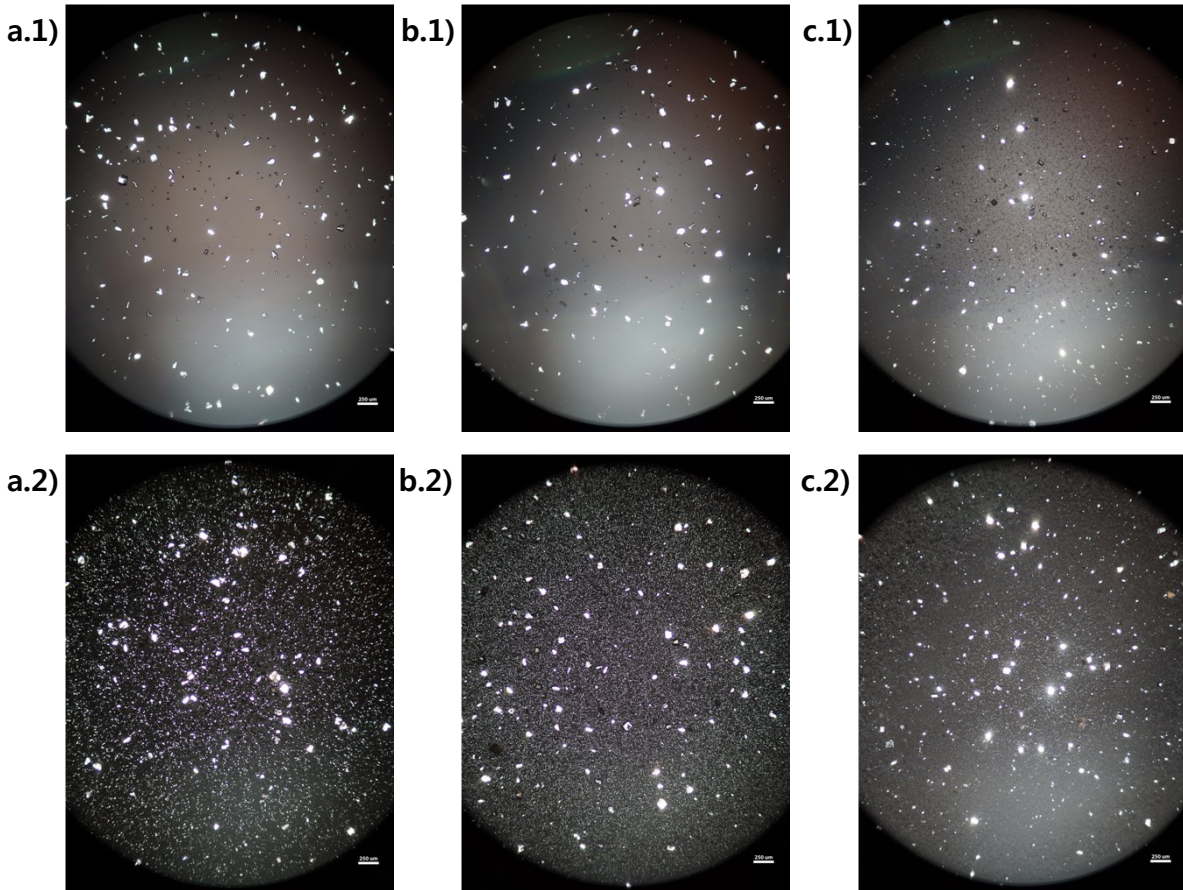

235

236 Figure 3. Representative micrographs from HEWL DoE Experiments 1–3. The upper image in each set is  
 237 representative of the seed PSD used in the associated experiment. The lower image in each set is  
 238 representative of the outlet PSD generated by the associated experiment. All images were acquired under  
 239 cross-polarized lighting conditions using identical microscope aperture, condenser, and magnification  
 240 (40X) settings. The scale bars are 250  $\mu\text{m}$  in all images. (a.1) Seed of Experiment 1. (a.2) Outlet of  
 241 Experiment 1. (b.1) Seed of Experiment 2. (b.2) Outlet of Experiment 2. (c.1) Seed of Experiment 3. (c.2)  
 242 Outlet of Experiment 3.

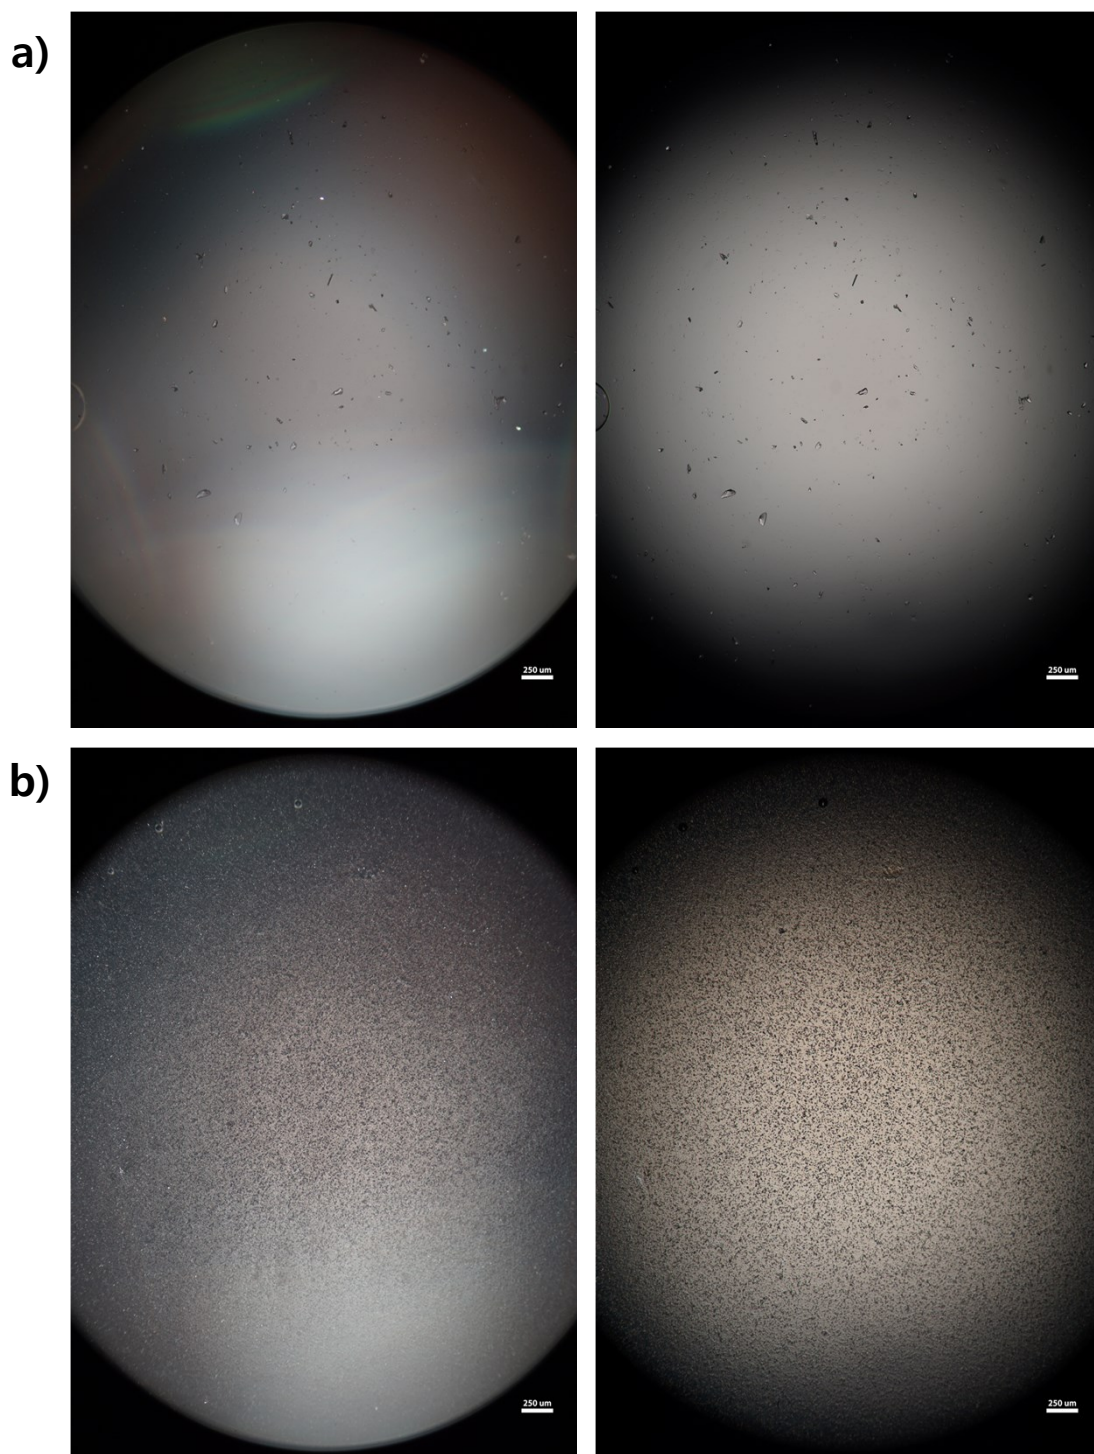

243  
 244 Figure 4. Representative micrographs from Experiment 4. The left image in each set was acquired under  
 245 cross-polarized lighting conditions, while the right image was captured using plane polarized light. The  
 246 crystal sample as not repositioned between image acquisitions. Identical microscope aperture, condenser,  
 247 and magnification (40X) settings were used for all four images. The scale bars are 250  $\mu\text{m}$  in all images.  
 248 (a) Seed. (b) Outlet.

249

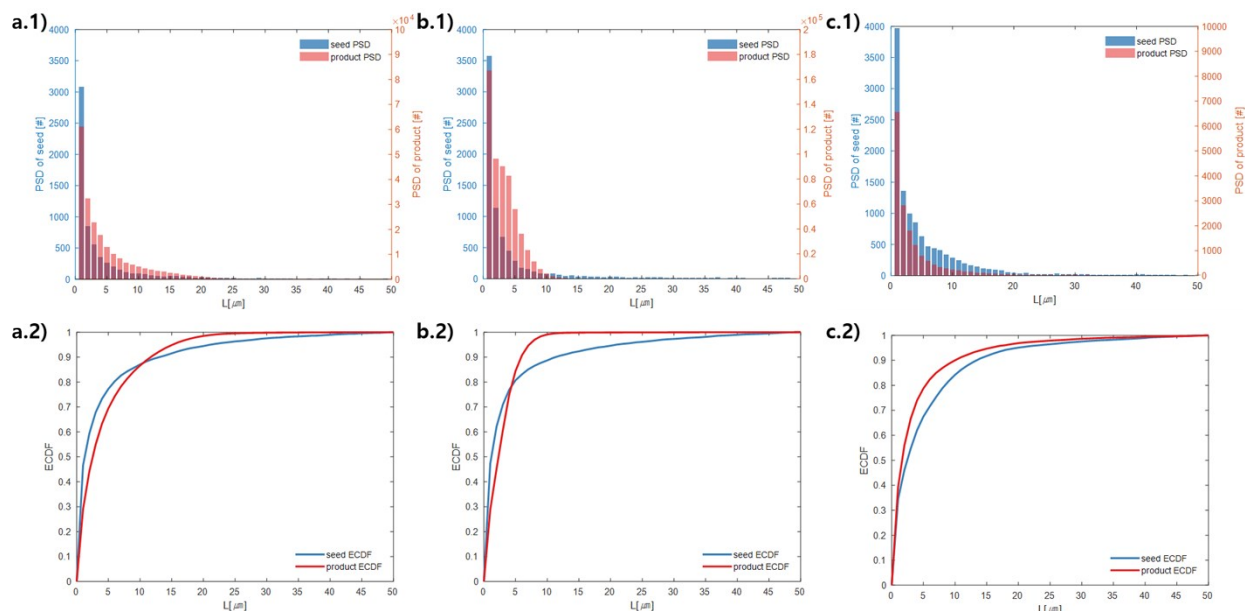

250

251 Figure 5. Measured particle size distribution (upper) and cumulative distribution function (lower) of seed  
252 (blue) and product (orange) crystals. (a.1) and (a.2), (b.1) and (b.2), and (c.1) and (c.2) are for Experiments  
253 1, 2, and 3 (summation of replicates), respectively. For all images, the horizontal axes are crystal length  
254 ( $\mu\text{m}$ ). The vertical axes are different for the seed and product crystals. As stated in Section 2.3, only particles  
255 that exhibited high-intensity constructive interference under cross-polarized light (Fig. 3) were considered  
256 crystals to calculate these PSDs.

257

258 With the image analysis procedure described in Section 2.3, micrographs of Experiments 1, 2,  
259 and 3 were used to measure the PSDs of the seed and generated crystals in Fig. 5 (Experiment 4  
260 was excluded from the analysis since the particles have a different solid state and so would have  
261 different solubility and crystallization kinetics). The crystallization conditions in Experiments 1  
262 and 2 yielded markedly different final PSDs than for Experiment 3. The leftward shift of the  
263 experimental cumulative distribution functions (ECDFs) for Experiments 1 and 2 from relatively  
264 heavy-tailed seed populations to substantially more monodisperse final distributions of small  
265 crystals ( $L < 30 \mu\text{m}$ ) suggests that, at an initial  $\sigma_{max} \geq 5$ , nucleation of HEWL crystals was strongly  
266 favored over the growth of existing particles. In contrast, the product PSD is much more similar

266 to the seed PSD in Experiment 3, with a similar level of broadness. The resulting PSDs are  
 267 consistent with the temperatures used in the experiments (Table 1). The temperature in Experiment  
 268 1 was dropped to its lowest value at the crystallizer inlet and kept the value low, which would  
 269 promote nucleation, until increasing the temperature at the end to promote growth. The large  
 270 number of nuclei generated upstream in Experiment 1 would limit the size in which the crystals  
 271 can grow downstream. The temperature in Experiment 2 also dropped to a low value at the  
 272 crystallizer inlet, then was raised which would result in dissolution, and then the temperature was  
 273 dropped to a very low value, and then kept low until the outlet. The large number of nuclei  
 274 generated upstream would then largely be dissolved in the dissolution part of the crystallizer, but  
 275 then a burst of nuclei would be generated again, which would then grow. The temperature in  
 276 Experiment 3 was monotonically decreased by small reductions (Table 1), which resulted in much  
 277 less nuclei formulation. Taken collectively, Fig. 5 demonstrates that, even over residence times as  
 278 short as 25–30 minutes, the continuous protein crystallization system can be used to tune the  
 279 characteristics of the protein crystal populations.

280 Table 2. Summary statistics for seed and product populations used in Experiments 1–3.  $N_T$  is the total  
 281 number of crystals,  $\bar{L}_{1,0}$ ,  $\bar{L}_{2,0}$ , and  $\bar{L}_{3,0}$  are the mean crystal length ( $\mu\text{m}$ ), surface area ( $\mu\text{m}^2$ ), and volume  
 282 ( $\mu\text{m}^3$ ) in given experiments (summation of replicates), respectively. All mean size statistics were calculated  
 283 using moments of the analytical derivatives of the ECDFs reported in Fig. 5. All  $N_T$  values were determined  
 284 directly from the PSDs reported in these same figures.

| Moment          | Experiment 1      |                   | Experiment 2      |                   | Experiment 3      |                   |
|-----------------|-------------------|-------------------|-------------------|-------------------|-------------------|-------------------|
|                 | Seed              | Product           | Seed              | Product           | Seed              | Product           |
| $N_T$           | $6.7 \times 10^3$ | $2.1 \times 10^5$ | $7.6 \times 10^3$ | $5.8 \times 10^5$ | $1.2 \times 10^4$ | $1.7 \times 10^4$ |
| $\bar{L}_{1,0}$ | 5.7               | 5.0               | 5.4               | 3.3               | 6.8               | 4.9               |
| $\bar{L}_{2,0}$ | $1.3 \times 10^2$ | $5.5 \times 10^1$ | $1.3 \times 10^2$ | $1.9 \times 10^1$ | $1.6 \times 10^2$ | $9.3 \times 10^1$ |
| $\bar{L}_{3,0}$ | $5.7 \times 10^3$ | $1.1 \times 10^3$ | $5.4 \times 10^3$ | $3.1 \times 10^2$ | $7.4 \times 10^3$ | $3.9 \times 10^3$ |



285 Continuously differentiable analytical expressions for these ECDFs were fitted using  
286 piecewise cubic Hermite interpolating polynomials and used to calculate the summary statistics in  
287 Table 2 via

$$f(L) = \frac{n(L)}{N_T}, \quad (1)$$

$$\bar{L}_{p,0} = \int_0^{\infty} L^p f(L) dL, p = 1, 2, \dots \quad (2)$$

288 where  $f(L)$  is the number normalized PSD and  $\bar{L}_{p,0}$  are weighted mean crystal sizes<sup>29</sup>.

289 The above observations from Fig. 5 are seen in the summary statistics in Table 2. Given that  
290 all PSDs were acquired from consistent total volumes of well-mixed slurries, the fact that

291  $\frac{N_{T,product}}{N_{T,seed}} > 10$  for Experiments 1 and 2 and  $\sim 1$  for Experiment 3 indicates that Experiments 1 and  
292 2 produced a much larger number of small crystals than Experiment 3. Further, for Experiments 1  
293 and 2, nucleation was so strongly favored the process resulted in a drastic decrease in the mean  
294 crystal volume  $\bar{L}_{3,0}$  ( $< 0.2x$ ) between the inlet and outlet of the system.

### 295 **3.2. Structural characterization of HEWL**

296 PXRD was employed as an orthogonal method to assess the qualitative crystallinity of all  
297 samples generated and confirm the results of cross-polarized microscopy. Fig. 6 plots low angle  
298 diffractograms for each of Experiments 1–4 from top to bottom. Where appropriate, diffractograms  
299 for replicate experiments are plotted on common axes. Additionally, an idealized powder  
300 diffractogram (bottom panel; purple line) for tetragonal HEWL served as a reference. All samples  
301 collected at the outlet of the crystallizer during Experiments 1–3 exhibit relatively defined  
302 diffraction peaks that match reference peak positions to within  $\pm 0.5^\circ 2\theta$ , suggesting that a

303 substantial fraction of the particles formed in each run was crystalline tetragonal HEWL. This  
304 small offset in  $2\theta$  can likely be attributed to the higher resolution and signal-to-noise ratio of single-  
305 crystal to powder XRD<sup>30</sup>. Differences in the number of structure-bound water molecules between  
306 samples could also convolute the traces. The systematic translation in  $2\theta$  evident between each  
307 pair of traces for Experiments 1–3 is the result of small ( $O(mm)$ ) differences in the positioning of  
308 each sample within the focusing circle of the diffractometer<sup>31</sup>. While the PXRD data unequivocally  
309 corroborate the formation of crystals in Experiments 1–3, all six diffractograms exhibit a broad  
310 parabolic baseline (‘halo’) that indicates the presence of some amorphous or short-range ordered  
311 nanocrystalline phases of matter<sup>32</sup>. Although techniques for estimating the relative ratio of  
312 amorphous to crystalline material in PXRD traces exist (*e.g.*, the Rietveld method), they are  
313 generally regarded as being difficult to implement and subject to large uncertainties<sup>33</sup>. A  
314 comparison of the top three panels of Fig. 6 to the black trace (Exp. 4; confirmed amorphous  
315 precipitate) in the bottom panel of the figure, however, bolsters the claim that Experiments 1–3  
316 yielded HEWL particles exhibiting significant crystalline character. HEWL analyzed as received  
317 from the manufacturer also produced a purely amorphous diffractogram (Fig. 6; bottom panel;  
318 gray line), which confirms the ability of the end-to-end seed population preparation and  
319 crystallization process to generate long-range ordered protein particles from otherwise disordered  
320 precursor materials.

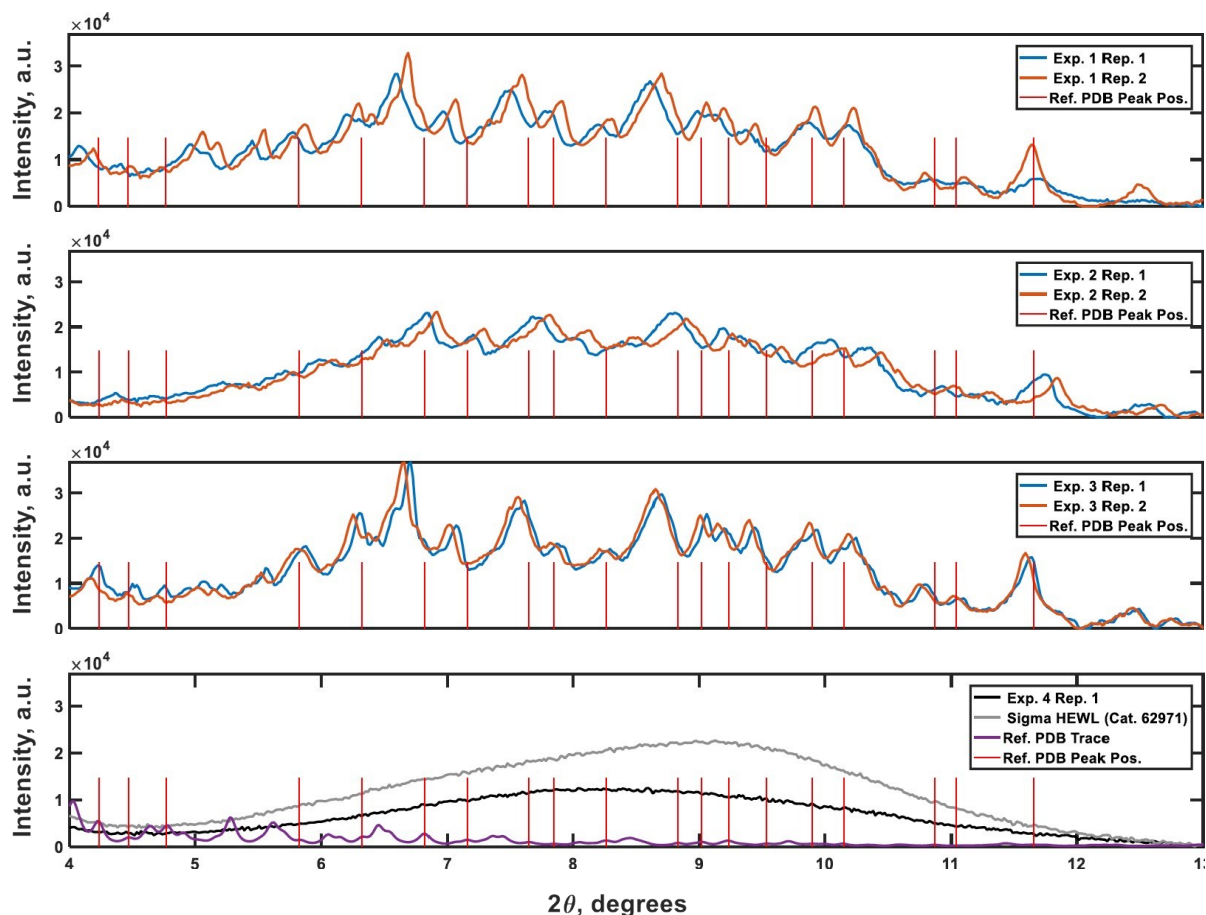

321  
 322 Figure 6. Powder X-ray diffraction traces characterizing the crystallinity of samples generated during the  
 323 experiments. Plots 1–3 (top to bottom) are the PXRD traces gathered for material generated in Experiments  
 324 1–3, respectively. The 4<sup>th</sup> plot shows reference non-crystalline spectra for manufacturer-supplied HEWL,  
 325 and HEWL intentionally precipitated out of solution using the CCHEx platform (black; Exp. 4). The purple  
 326 trace in the bottommost plot is an idealized PXRD diffractogram calculated using publicly available single-  
 327 crystal XRD data banked in the RCSB Protein Data Bank (ID: 3wun). The vertical red lines in each plot  
 328 correspond to the positions of a subset of the critical peaks in the idealized PXRD trace. The intensity of  
 329 the lines is arbitrary.

330 Lastly, negative control diffractograms for a blank sample tray and vacuum-dried HEWL  
 331 dissolution buffer are presented in Fig. 7. The diffractogram for the blank sample tray exhibits a  
 332 flat baseline for  $2\theta \geq 3^\circ$ . Similarly, the HEWL dissolution buffer diffractogram exhibits only a  
 333 single peak within the range  $9.5^\circ \leq 2\theta \leq 10^\circ$ , which is characteristic of NaOAc. These controls

334 indicate that neither the dissolution buffer nor the sample tray are expected to obscure the PXRD  
335 peaks of HEWL under the measurement conditions employed<sup>34</sup>.

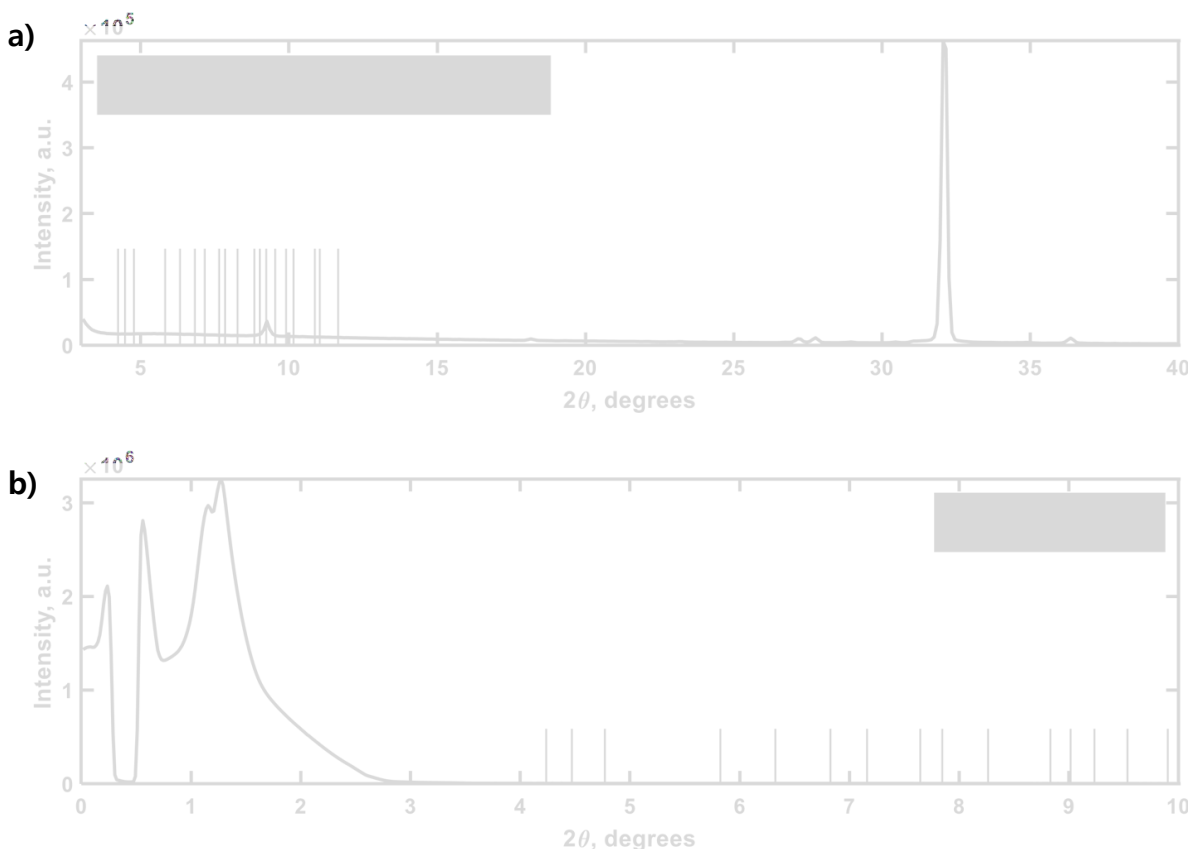

336  
337 Figure 7. Control PXRD diffractograms of HEWL dissolution buffer (a) and zero-background sample tray  
338 (b). The vertical red lines in each panel correspond to a subset of the critical peak positions in an idealized  
339 diffractogram calculated from single-crystal XRD data for tetragonal HEWL (PDBid: 3wun). (a) The  
340 doublet at  $\sim 27.5^\circ 2\theta$  are characteristic of NaCl. The low intensity peak at  $\sim 9^\circ 2\theta$  is characteristic of NaOAc  
341 (and is subject to shift above  $10^\circ 2\theta$  due to variations in molecular hydration). (b) The high-intensity  
342 baseline below  $3^\circ 2\theta$  is likely the result of direct beam scattering off of the sample tray itself at these  
343 extremely shallow angles.

344

#### 345 **4. Conclusion**

346 A continuous slug-flow crystallizer comprising reconfigurable, feedback-controlled, counter-  
347 current heat exchangers is applicable to mediating protein crystallization. Experiments using hen

348 egg white lysozyme as the model protein showed that particle size distributions could be  
349 reproducibly manipulated using temperature gradients alone over a residence time of only 25–30  
350 minutes. The formation of XRD-crystalline particles of HEWL was robust to maximum relative  
351 supersaturation gradients spanning two orders of magnitude, with  $\sigma_{max}$  values  $\geq 5$  favoring the  
352 nucleation over the growth of existing crystals. In addition, the in-line mixing of concentrated  
353 precipitant solution allowed  $\sigma_{max}$  values as large as 220 to be achieved in concert with steep  
354 temperature gradients. Powder x-ray diffraction indicated that  $\sigma_{max}$  of this magnitude  
355 overwhelmingly favored the formation of amorphous precipitates, which would have lower  
356 stability and higher solubility than crystals. The low cost and disposable nature of the slug-flow  
357 continuous crystallizer (~\$100 for the disposable tubing) and the ability to tune the particle size  
358 distribution suggest that this crystallization platform could be suitable in applications where the  
359 protein therapeutic is delivered in crystalline form, since the PSD directly affects the rate in which  
360 the protein would be absorbed by the body.

361 **Conflict of Interest**

362 There are no conflicts to declare.

363 **Acknowledgement**

364 This study was supported by the Bill & Melinda Gates Foundation [OPP1154682]. The  
365 findings and conclusions contained within are those of the authors and do not necessarily reflect  
366 positions or policies of the Bill & Melinda Gates Foundation. Financial support is acknowledged  
367 from the Engineering Development Research Center (EDRC) at Seoul National University for  
368 Yongkyu Lee. Leia Dwyer and Carlos Sieperman are acknowledged for PXRD training.

- 370 1. Gagnon, P., Technology trends in antibody purification. *Journal of Chromatography A*  
371 **2012**, *1221*, 57-70.
- 372 2. Jungbauer, A., Continuous downstream processing of biopharmaceuticals. *Trends in*  
373 *Biotechnology* **2013**, *31* (8), 479-492.
- 374 3. Konstantinov, K. B.; Cooney, C. L., White paper on continuous bioprocessing May 20–21  
375 2014 continuous manufacturing symposium. *Journal of Pharmaceutical Sciences* **2015**, *104* (3),  
376 813-820.
- 377 4. Kelley, B., Very large scale monoclonal antibody purification: The case for conventional  
378 unit operations. *Biotechnology Progress* **2008**, *23* (5), 995-1008.
- 379 5. Kelley, B., Industrialization of mAb production technology: The bioprocessing industry at  
380 a crossroads. *mAbs* **2009**, *1* (5), 443-452.
- 381 6. Hong, M. S.; Severson, K. A.; Jiang, M.; Lu, A. E.; Love, J. C.; Braatz, R. D., Challenges  
382 and opportunities in biopharmaceutical manufacturing control. *Computers & Chemical*  
383 *Engineering* **2018**, *110*, 106-114.
- 384 7. Zydney, A. L., Continuous downstream processing for high value biological products: A  
385 Review. *Biotechnology and Bioengineering* **2015**, *113* (3), 465-475.
- 386 8. Bryntesson, M.; Hall, M.; Lacki, K. Chromatography method. U.S. Patent 7,901,581, Mar  
387 8, 2011.
- 388 9. Warikoo, V.; Godawat, R.; Brower, K.; Jain, S.; Cummings, D.; Simons, E.; Johnson, T.;  
389 Walther, J.; Yu, M.; Wright, B.; McLarty, J.; Karey, K. P.; Hwang, C.; Zhou, W.; Riske, F.;  
390 Konstantinov, K., Integrated continuous production of recombinant therapeutic proteins.  
391 *Biotechnology and Bioengineering* **2012**, *109* (12), 3018-3029.
- 392 10. Eggersgluess, J.; Wellsandt, T.; Strube, J., Integration of aqueous two-phase extraction  
393 into downstream processing. *Chemical Engineering & Technology* **2014**, *37* (10), 1686-1696.
- 394 11. Hammerschmidt, N.; Tscheliessnig, A.; Sommer, R.; Helk, B.; Jungbauer, A., Economics  
395 of recombinant antibody production processes at various scales: Industry-standard compared to  
396 continuous precipitation. *Biotechnology Journal* **2014**, *9* (6), 766-775.
- 397 12. Neugebauer, P.; Khinast, J. G., Continuous crystallization of proteins in a tubular plug-  
398 flow crystallizer. *Crystal Growth & Design* **2015**, *15* (3), 1089-1095.
- 399 13. Crowell, L. E.; Lu, A. E.; Love, K. R.; Stockdale, A.; Timmick, S. M.; Wu, D.; Wang, Y.;  
400 Doherty, W.; Bonnyman, A.; Vecchiarello, N.; Goodwine, C.; Bradbury, L.; Brady, J. R.; Clark,  
401 J. J.; Colant, N. A.; Cvetkovic, A.; Dalvie, N. C.; Liu, D.; Liu, Y.; Mascarenhas, C. A.; Matthews,  
402 C. B.; Mozdierz, N. J.; Shah, K. A.; Wu, S.-L.; Hancock, W. S.; Braatz, R. D.; Cramer, S. M.;  
403 Love, J. C., On-demand manufacturing of clinical-quality biopharmaceuticals. *Nature*  
404 *Biotechnology* **2018**, *36* (10), 988-995.
- 405 14. Lu, A. E.; Paulson, J. A.; Mozdierz, N. J.; Stockdale, A.; Versypt, A. N. F.; Love, K. R.;  
406 Love, J. C.; Braatz, R. D., Control systems technology in the advanced manufacturing of biologic  
407 drugs. In *Proc. of the IEEE Conference on Control Applications*, 2015; pp. 1505-1515.
- 408 15. Hekmat, D., Large-scale crystallization of proteins for purification and formulation.  
409 *Bioprocess and Biosystems Engineering* **2015**, *38* (7), 1209-1231.
- 410 16. McPherson, A., Introduction to protein crystallization. *Methods* **2004**, *34* (3), 254-265.

- 411 17. Russo Krauss, I.; Merlino, A.; Vergara, A.; Sica, F., An overview of biological  
412 macromolecule crystallization. *International Journal of Molecular Sciences* **2013**, *14* (6), 11643-  
413 11691.
- 414 18. Baker, J. C.; Roberts, B. M. Preparation of stable insulin analog crystals. U.S. Patent  
415 5,597,893, Jan 28, 1997.
- 416 19. Mitragotri, S.; Burke, P. A.; Langer, R., Overcoming the challenges in administering  
417 biopharmaceuticals: formulation and delivery strategies. *Nature Reviews Drug Discovery* **2014**,  
418 *13* (9), 655-672.
- 419 20. Zhang, D.; Xu, S.; Du, S.; Wang, J.; Gong, J., Progress of pharmaceutical continuous  
420 crystallization. *Engineering* **2017**, *3* (3), 354-364.
- 421 21. Mozdierz, N. J. Developing scalable and modular technologies for continuous  
422 biopharmaceutical production. Ph.D. thesis. Massachusetts Institute of Technology, Cambridge,  
423 MA, 2018.
- 424 22. Mozdierz, N. J.; Lee, Y.; Hong, M. S.; Benisch, M. H. P.; Rasche, M. L.; Tropp, U. E.;  
425 Jiang, M.; Myerson, A. S.; Braatz, R. D., Mathematical modeling and experimental validation of  
426 continuous slug-flow tubular crystallization with ultrasonication-induced nucleation and spatially  
427 varying temperature. *Chemical Engineering Research and Design* **2021**, *169*, 275-287.
- 428 23. Pirkle, J. C.; Rasche, M. L.; Braatz, R. D.; Jiang, M., CHAPTER 5 Slug-flow continuous  
429 crystallization: Fundamentals and process intensification. In *The Handbook of Continuous*  
430 *Crystallization*, The Royal Society of Chemistry: Croydon, UK, 2020; pp. 219-247.
- 431 24. Forsythe, E. L.; Judge, R. A.; Pusey, M. L., Tetragonal chicken egg white lysozyme  
432 solubility in sodium chloride solutions. *Journal of Chemical & Engineering Data* **1999**, *44* (3),  
433 637-640.
- 434 25. Chayen, N. E., Methods for separating nucleation and growth in protein crystallisation.  
435 *Progress in Biophysics and Molecular Biology* **2005**, *88* (3), 329-337.
- 436 26. Pons Siepermann, C. A.; Huang, S.; Myerson, A. S., Nucleation inhibition of benzoic acid  
437 through solution complexation. *Crystal Growth & Design* **2017**, *17* (5), 2646-2653.
- 438 27. Dombrowski, R. T., 1 - Microscopy techniques for analyzing the phase nature and  
439 morphology of biomaterials. In *Characterization of Biomaterials*, Jaffe, M.; Hammond, W.;  
440 Toliás, P.; Arinze, T., Eds. Woodhead Publishing: Waltham, MA, 2013; pp. 1-33.
- 441 28. Myerson, A., *Handbook of Industrial Crystallization*. Butterworth-Heinemann: Woburn,  
442 MA, 2002.
- 443 29. Ranodolph, A., *Theory of Particulate Processes: Analysis and Techniques of Continuous*  
444 *Crystallization*. Elsevier: New York, 2012.
- 445 30. Varlashkin, P., Approaches to quantification of amorphous content in crystalline drug  
446 substance by powder X-ray diffraction. *American Pharmaceutical Review* **2011**, *14* (1), 22-28.
- 447 31. Speakman, S., Basics of X-Ray Powder Diffraction: Training to Become an Independent  
448 User of the X-Ray SEF at the Center for Materials Science and Engineering at MIT. *Online*][Cited:  
449 April 6, 2017.] [http://prism.mit.edu/xray/oldsite/Basics%20of%20X-Ray%20Powder%](http://prism.mit.edu/xray/oldsite/Basics%20of%20X-Ray%20Powder%20Diffraction.pdf)  
450 [20Diffraction.pdf](http://prism.mit.edu/xray/oldsite/Basics%20of%20X-Ray%20Powder%20Diffraction.pdf).
- 451 32. Bates, S.; Zografí, G.; Engers, D.; Morris, K.; Crowley, K.; Newman, A., Analysis of  
452 amorphous and nanocrystalline solids from their X-ray diffraction patterns. *Pharmaceutical*  
453 *Research* **2006**, *23* (10), 2333-2349.

- 454 33. Kemethmüller, S.; Roosen, A.; Goetz-Neunhoeffler, F.; Neubauer, J., Quantitative analysis  
455 of crystalline and amorphous phases in glass–ceramic composites like LTCC by the Rietveld  
456 method. *Journal of the American Ceramic Society* **2006**, 89 (8), 2632-2637.
- 457 34. Kumar, R.; Vyas, S.; Kumar, R.; Dixit, A., Development of sodium acetate trihydrate-  
458 ethylene glycol composite phase change materials with enhanced thermophysical properties for  
459 thermal comfort and therapeutic applications. *Scientific Reports* **2017**, 7 (1), 1-11.

460
